# Supplementary material for: Detection of Natural Resistance-Associated Substitutions by Ion Semiconductor Technology in HCV1b Positive, Direct-Acting Antiviral Agents-Naïve Patients
Source: PubMed Central journal article supplement (PMC5037695; doi:10.3390/ijms17091416), 2016-08-27
Supplement: ijms-17-01416-s001.pdf [file ijms-17-01416-s001.pdf]

# Supplementary Materials: Detection of Natural Resistance-Associated Substitutions by Ion Semiconductor Technology in HCV1b Positive, Direct-Acting Antiviral Agents-Naïve Patients

Nadia Marascio, Grazia Pavia, Alessio Strazzulla, Tim Dierckx, Lize Cuypers, Bram Vrancken, Giorgio Settimo Barreca, Teresa Mirante, Donatella Malanga, Duarte Mendes Oliveira, Anne-Mieke Vandamme, Carlo Torti, Maria Carla Liberto, Alfredo Focà and the SINERGIE-UMG Study Group

**Table S1.** Accession numbers of NS3 and NS5B reference sequences available in Los Alamos HCV Sequence Database.

| Accession Number | HCV Subtype | Genomic Region |
|------------------|-------------|----------------|
| M67463           | 1a          | NS3 and NS5B   |
| EF407419         | 1a          | NS3 and NS5B   |
| AF511950         | 1a          | NS3 and NS5B   |
| EF032892         | 1b          | NS3 and NS5B   |
| AY587016         | 1b          | NS3 and NS5B   |
| D11355           | 1b          | NS3 and NS5B   |
| D14853           | 1c          | NS3 and NS5B   |
| AY051292         | 1c          | NS3 and NS5B   |
| AM910652         | 1g          | NS3 and NS5B   |
| AY746460         | 2a          | NS3 and NS5B   |
| D10988           | 2b          | NS3 and NS5B   |
| D50409           | 2c          | NS3 and NS5B   |
| X76918           | 3a          | NS3 and NS5B   |
| D49374           | 3b          | NS3 and NS5B   |
| Y11604           | 4a          | NS3 and NS5B   |
| FJ462435         | 4b          | NS3 and NS5B   |
| FJ462436         | 4c          | NS3 and NS5B   |
| FJ462437         | 4d          | NS3 and NS5B   |
| EF589160         | 4f          | NS3 and NS5B   |
| NC_009826        | 5a          | NS3            |
| EUH1480          | 5a          | NS5B           |
| DQ278892         | 6           | NS3 and NS5B   |
| AY859526         | 6a          | NS3 and NS5B   |
| NC_009827        | 6b          | NS3 and NS5B   |
| EF108306         | 7a          | NS3 and NS5B   |
